# Supplementary material for: Polyethylene glycol-induced self-assembly to synthesize an ordered mesoporous polymer with a two-dimensional hexagonal structure
Source: Royal Society of Chemistry journal article supplement (doi:10.1039/c2ta00843b), 2012-12-14
Supplement: c2ta00843b.pdf [file c2ta00843b.pdf]

## Supporting Information

### Polyethylene Glycol-Induced Self-Assembly to Synthesize Ordered Mesoporous Polymer with Two-Dimensional Hexagonal Structure

Yeru Liang<sup>‡</sup>, Sihong Lu<sup>‡</sup>, Dingcai Wu<sup>\*</sup>, Bin Sun, Fei Xu, Ruowen Fu

*Materials Science Institute, PCFM Lab and DSAPM Lab, School of Chemistry and  
Chemical Engineering, Sun Yat-sen University, Guangzhou 510275, P. R China*

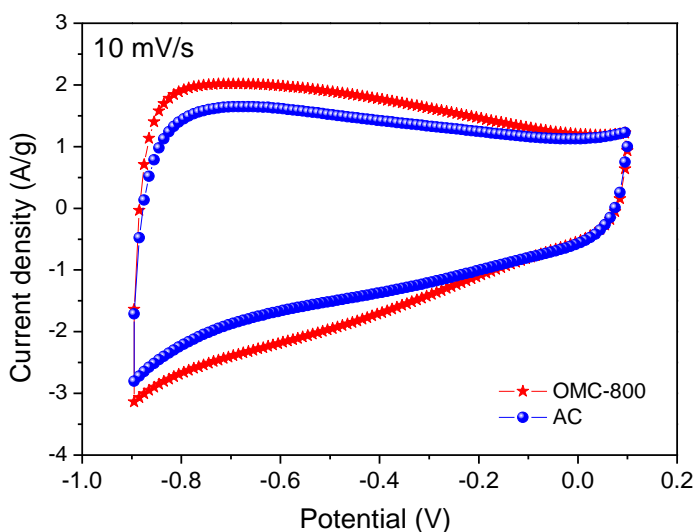

**Fig. S1** Cyclic voltammogram of OMC-800 and AC at sweep rate of 10 mV/s.

---

<sup>‡</sup> These authors contributed equally.    <sup>\*</sup> Corresponding author, E-mail:  
[wudc@mail.sysu.edu.cn](mailto:wudc@mail.sysu.edu.cn)

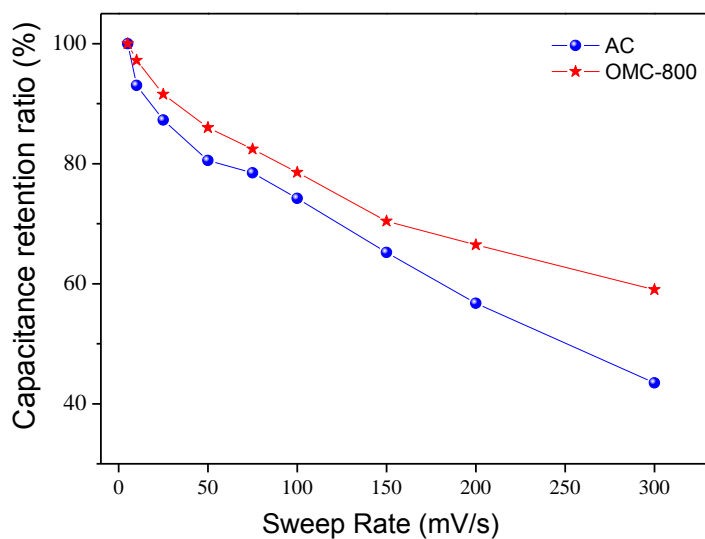

**Fig. S2** The mass specific capacitance retention ratio as a function of sweep rates from 5 to 300 mV/s for OMC-800 and AC.

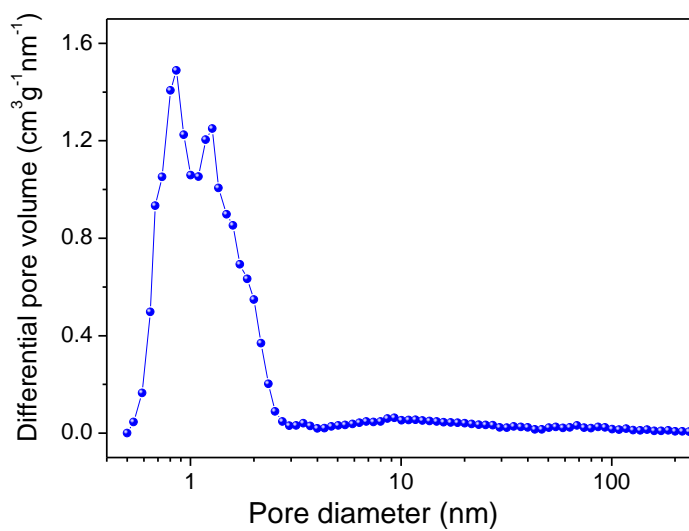

**Fig. S3** DFT pore size distribution of AC.
